# Supplementary material for: Study of structural and composition redesign to enhance the thermostability and electrochemical performance of a Co-less Ni-rich LiNi 0.92 Co 0.04 Mn 0.04 O 2 layered cathode through transition-metal concentration gradient strategies
Source: Royal Society of Chemistry journal article supplement (doi:10.1039/d4ta06648k), 2024-12-24
Supplement: d4ta06648k1.pdf [file d4ta06648k1.pdf]

## Supporting Information

### **Study of Structural and Composition Redesign to Enhanced the Thermostability and Electrochemical Performance of Co-less Ni-rich $\text{LiNi}_{0.92}\text{Co}_{0.04}\text{Mn}_{0.04}\text{O}_2$ Layered Cathode through Transition-metal Concentration Gradient Strategies**

Yola Bertilsya Hendri<sup>a</sup>, Manojkumar Seenivasan<sup>a</sup>, Juliya Jeyakumar<sup>a</sup>, Yi-Shiuan Wu<sup>a</sup>, She-Huang Wu<sup>a,c</sup>, Jeng-Kuei Chang<sup>d</sup>, Amun Amri<sup>f</sup>, Rajan Jose<sup>a,e</sup>, Chun-Chen Yang<sup>a,b,g\*</sup>

<sup>a</sup>*Battery Research Center of Green Energy, Ming Chi University of Technology, Taishan, New Taipei City, 24301, Taiwan*

<sup>b</sup>*Department of Chemical Engineering, Ming Chi University of Technology, Taishan, New Taipei City, 24301, Taiwan*

<sup>c</sup>*Graduate Institute of Science and Technology, National Taiwan University of Science and Technology, 43, Sec. 4, Keelung Road, Taipei 106, Taiwan*

<sup>d</sup>*Department of Materials Science and Engineering, National Yang Ming Chiao Tung University, 1001 University Road, Hsinchu, 30010, Taiwan*

<sup>e</sup>*Nanostructured Renewable Energy Materials Laboratory, Faculty of Industrial Sciences and Technology, University Malaysia Pahang, 26300 Kuantan, Malaysia*

<sup>f</sup>*Department of Chemical Engineering, University of Riau, Panam, Pekanbaru, 28293, Indonesia*

<sup>g</sup>*Department of Chemical and Materials Engineering, and Green Technology Research Center, Chang Gung University, Taoyuan City 333, Taiwan*

\*Corresponding author. Tel.: +886 2 29089899 ext.4962/4952;

fax: +886 2 29085941.

E-mail: [ccyang@mail.mcut.edu.tw](mailto:ccyang@mail.mcut.edu.tw) (C.-C. Yang)

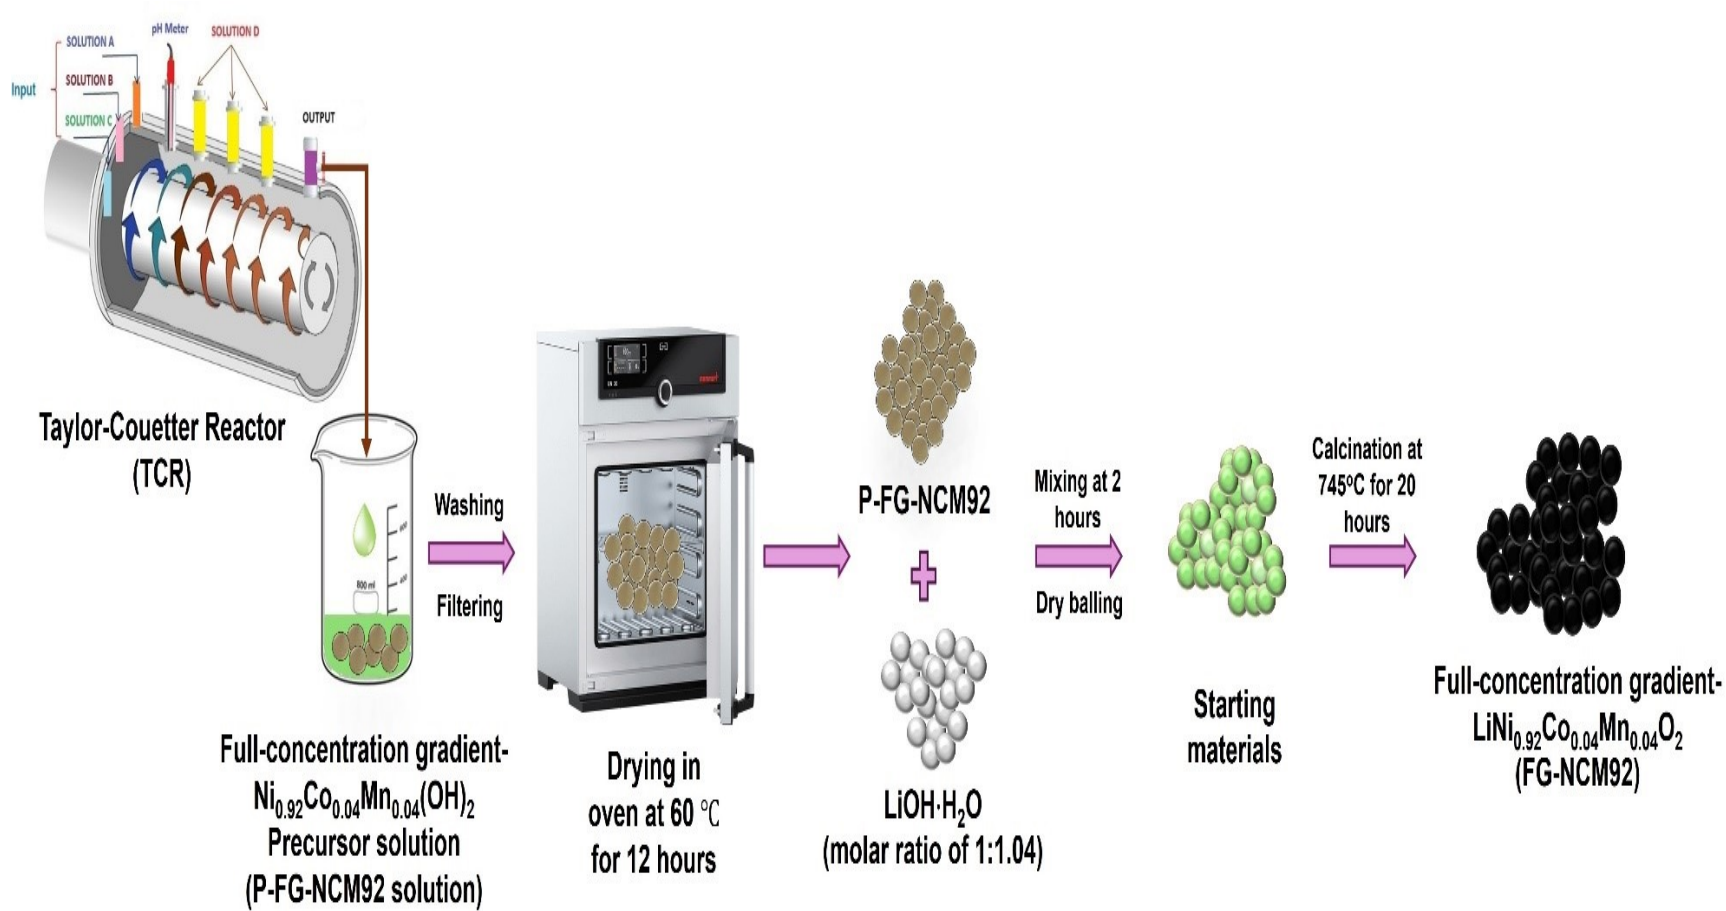

**Fig. S1.** Schematic diagram of FG-NCM92 synthesis process by using a novel scalable Taylor–Vortex Reactor (TVR).

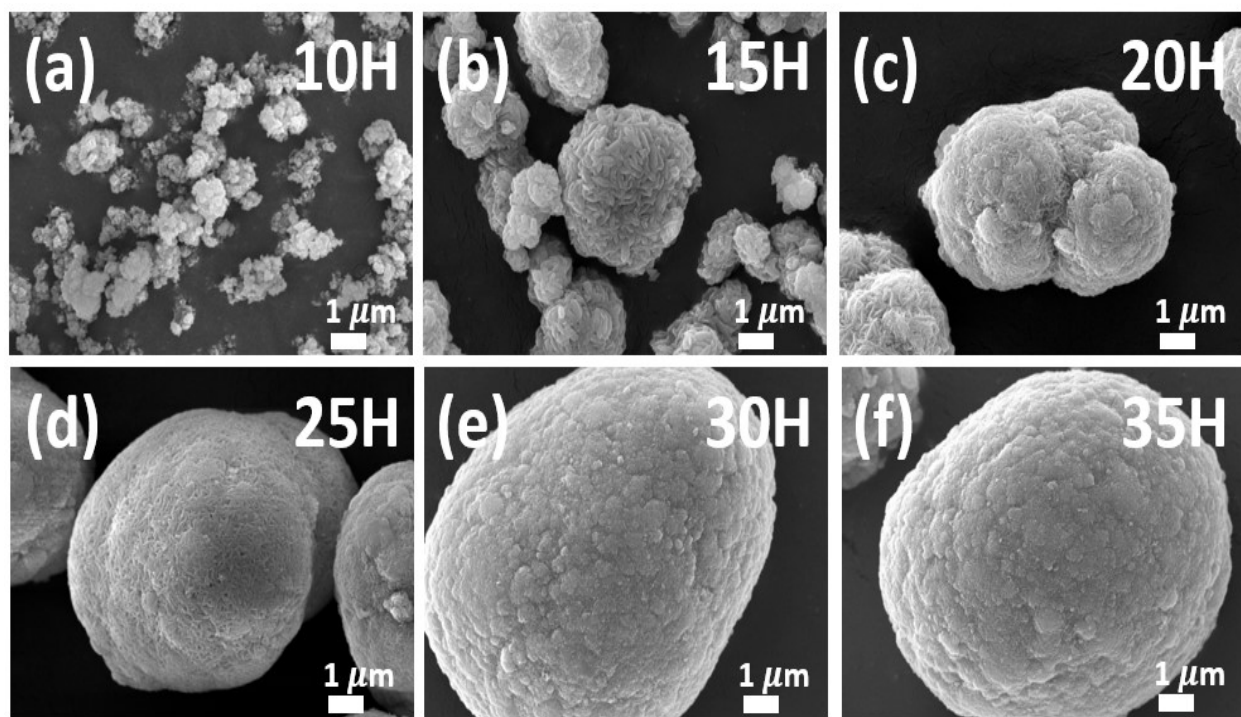

**Fig. S2.** The morphological evolution of P-FG-NCM92 hydroxide particles as a function of reaction time synthesis by using a novel scalable Taylor–Vortex Reactor (TVR): (a). 10 h, (b). 15 h, (c). 20 h, (d). 25 h, (e). 30 h, (f). 35 h, respectively.

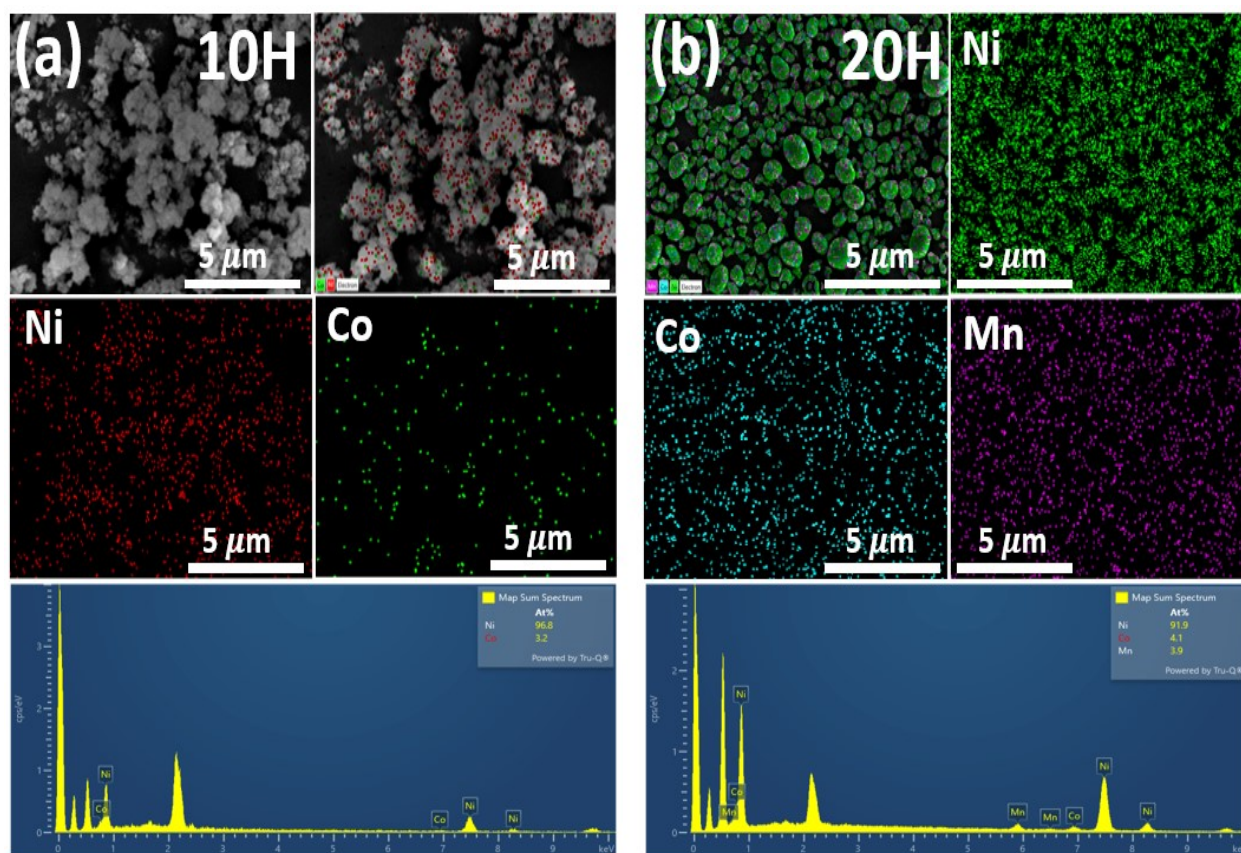

**Fig. S3.** EDX images of FG-Ni<sub>0.92</sub>Co<sub>0.04</sub>Mn<sub>0.04</sub>(OH)<sub>2</sub> precursors synthesized by using TVR reactor

at (a) 10 h, and (b) 20 h.

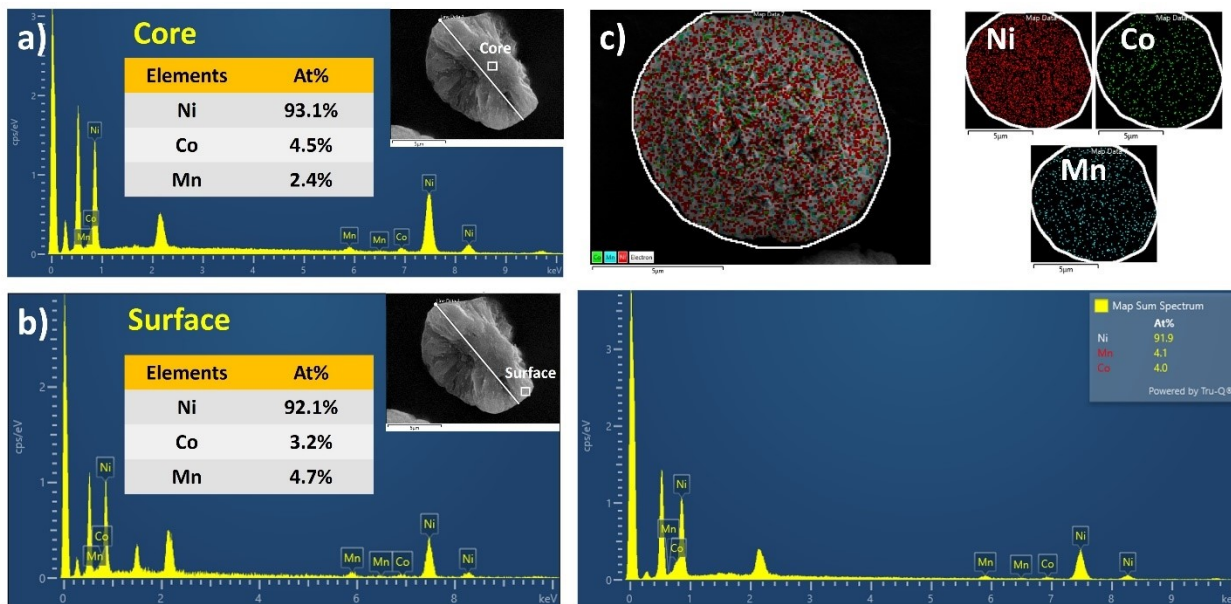

**Fig. S4.** The EDS graph of (a) area core and (b) area surface in the  $\text{FG-Ni}_{0.92}\text{Co}_{0.04}\text{Mn}_{0.04}(\text{OH})_2$ , and (c) single particle of  $\text{FG-Ni}_{0.92}\text{Co}_{0.04}\text{Mn}_{0.04}(\text{OH})_2$ .

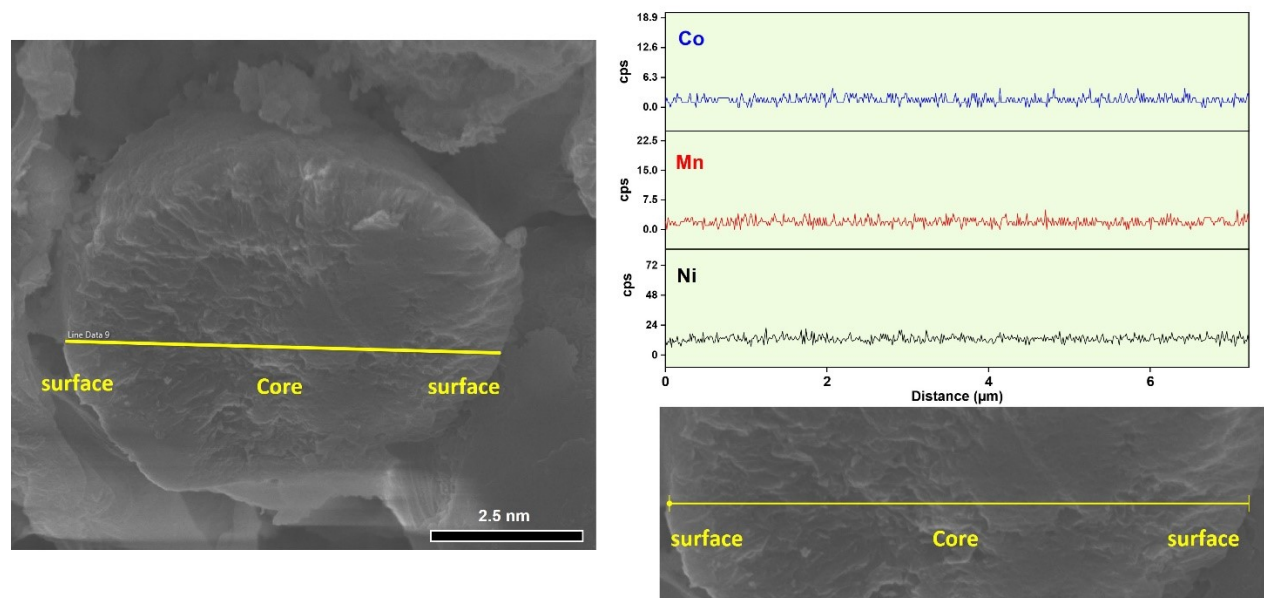

**Fig. S5.** FESEM-EDS-line-scanning of Ni, Co, Mn for P-NG-NCM92 precursors synthesized by a Taylor-Vortex Reactor (TVR).

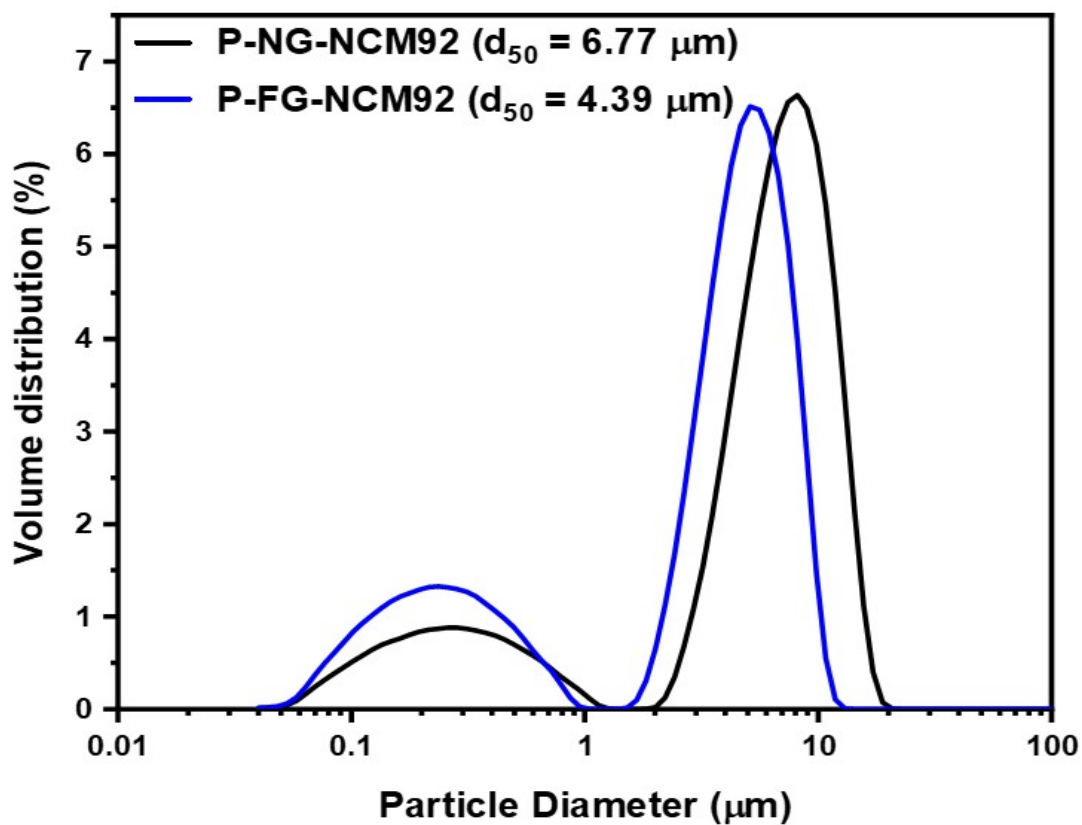

**Fig. S6.** Particle size distribution of (a) P-NG-NCM92 (black line), and (b) P-FG-NCM92 (blue line) hydroxide precursors.



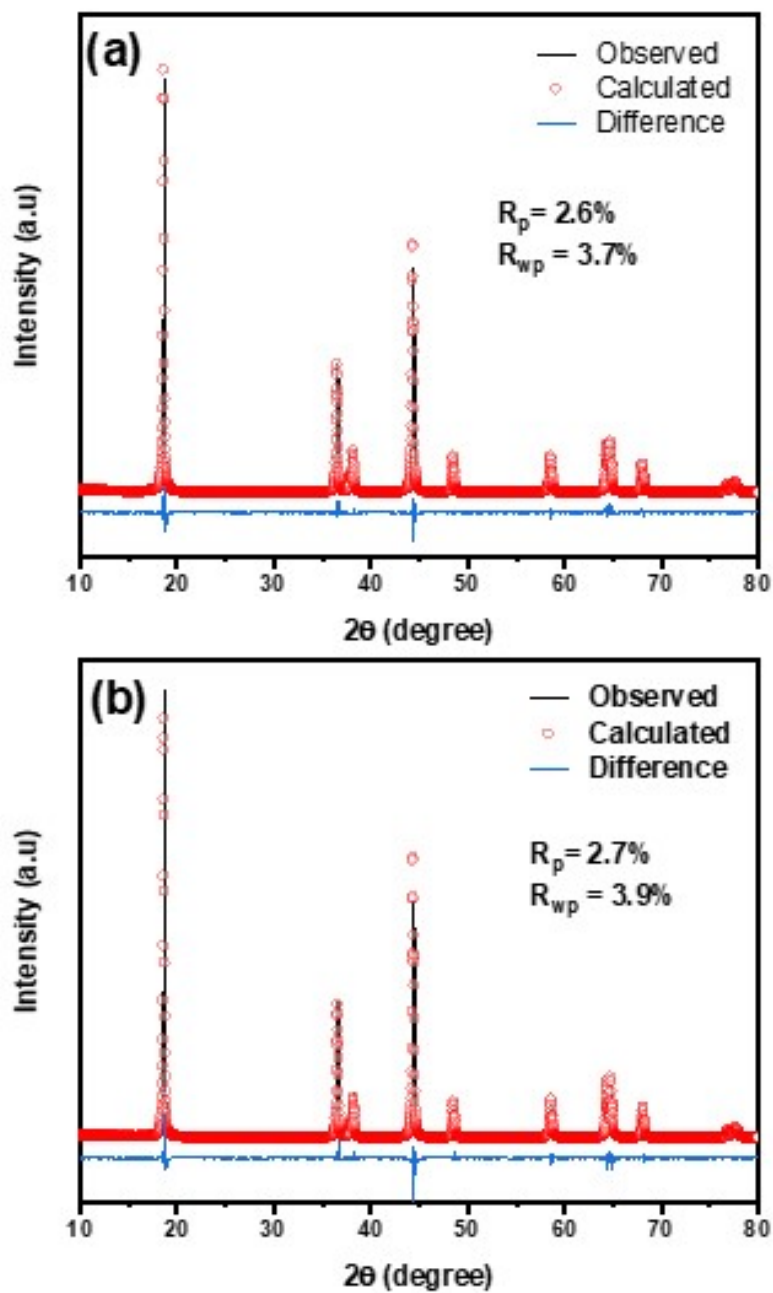

**Fig. S7.** XRD Rietveld refinement results of (a) NG-NCM92, and (b) FG-NCM92 layered oxides cathode materials, respectively.



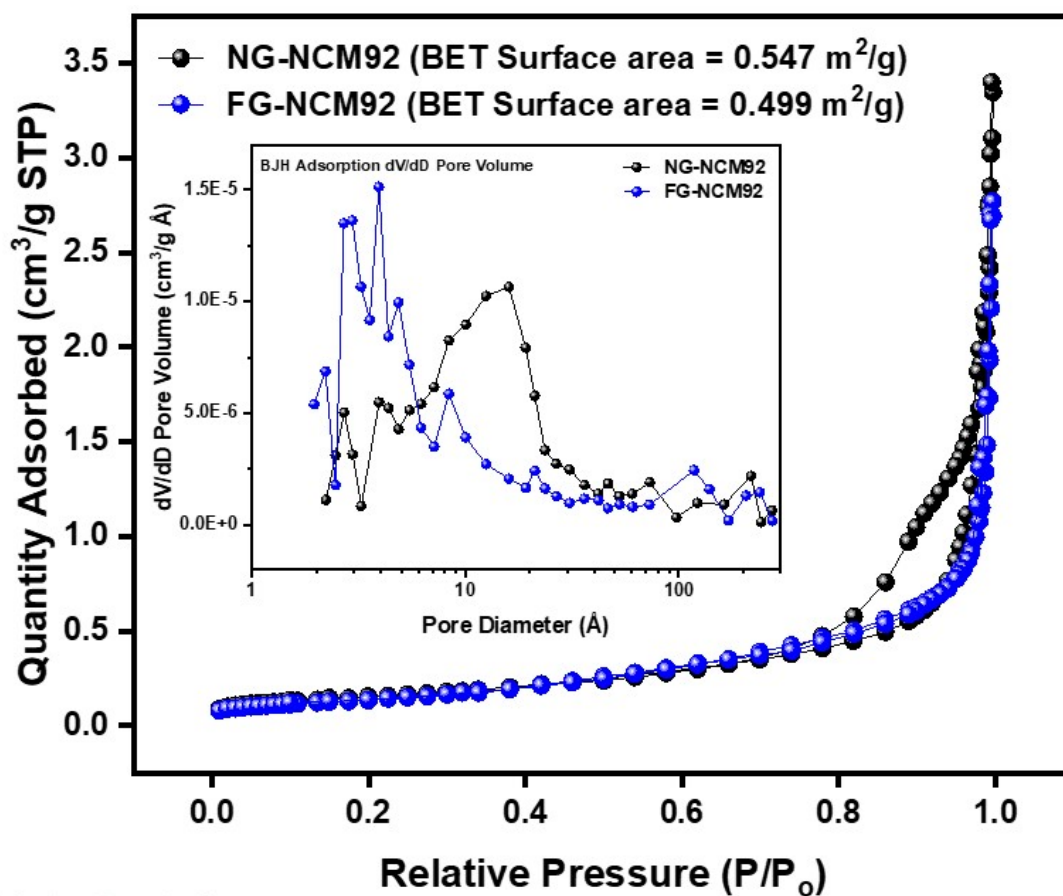

**Fig. S8.** BET specific surface area and pore size distribution (shown in the inset) of NG-NCM92 and FG-NCM92 layered oxide cathode materials.

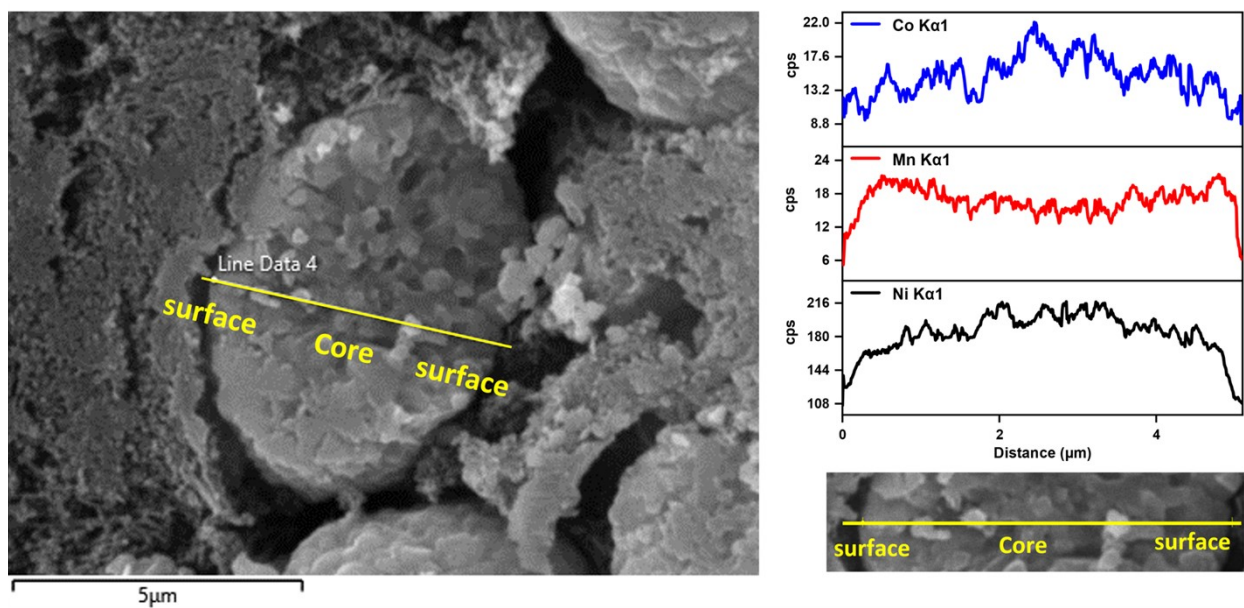

**Fig. S9.** SEM-EDS-line-scanning of Ni, Co, Mn for FG-NCM92 cathode.

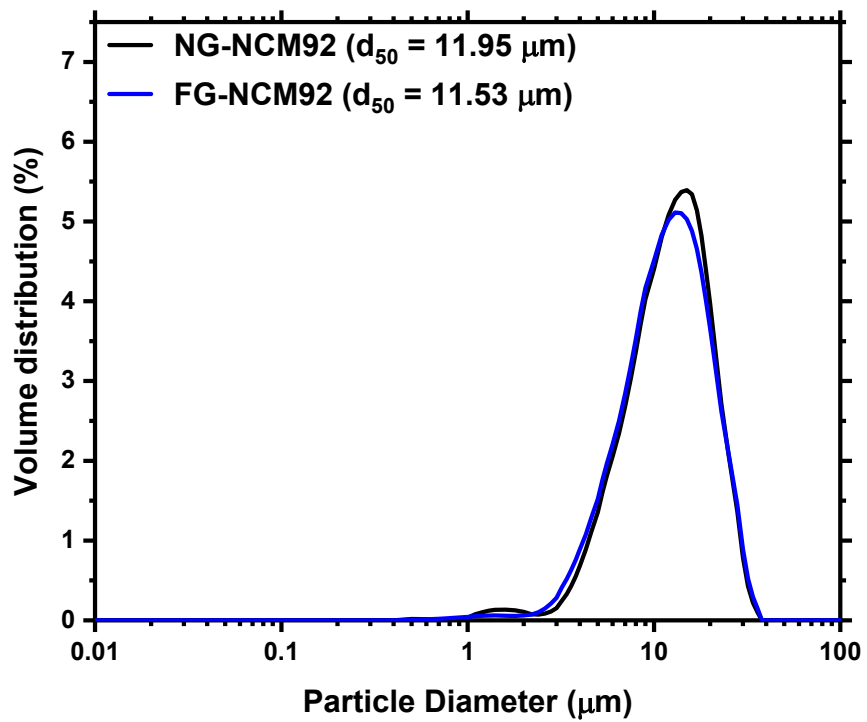

**Fig. S10.** Particle size distribution of NG-NCM92 (black line) and FG-NCM92 (blue line) cathode oxide materials.

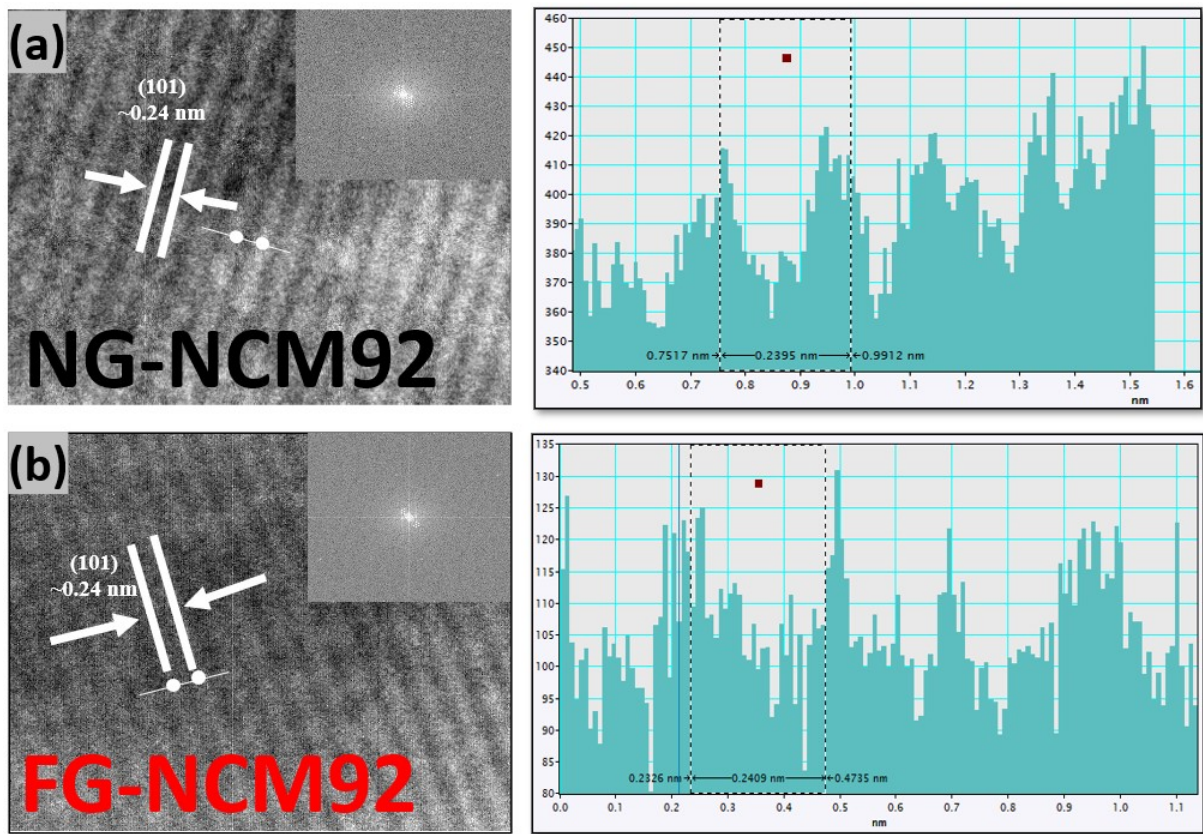

**Fig. S11.** The FFT and IFFT analysis of (a) NG-NCM92, and (b) FG-NCM92 layered oxide cathode materials.

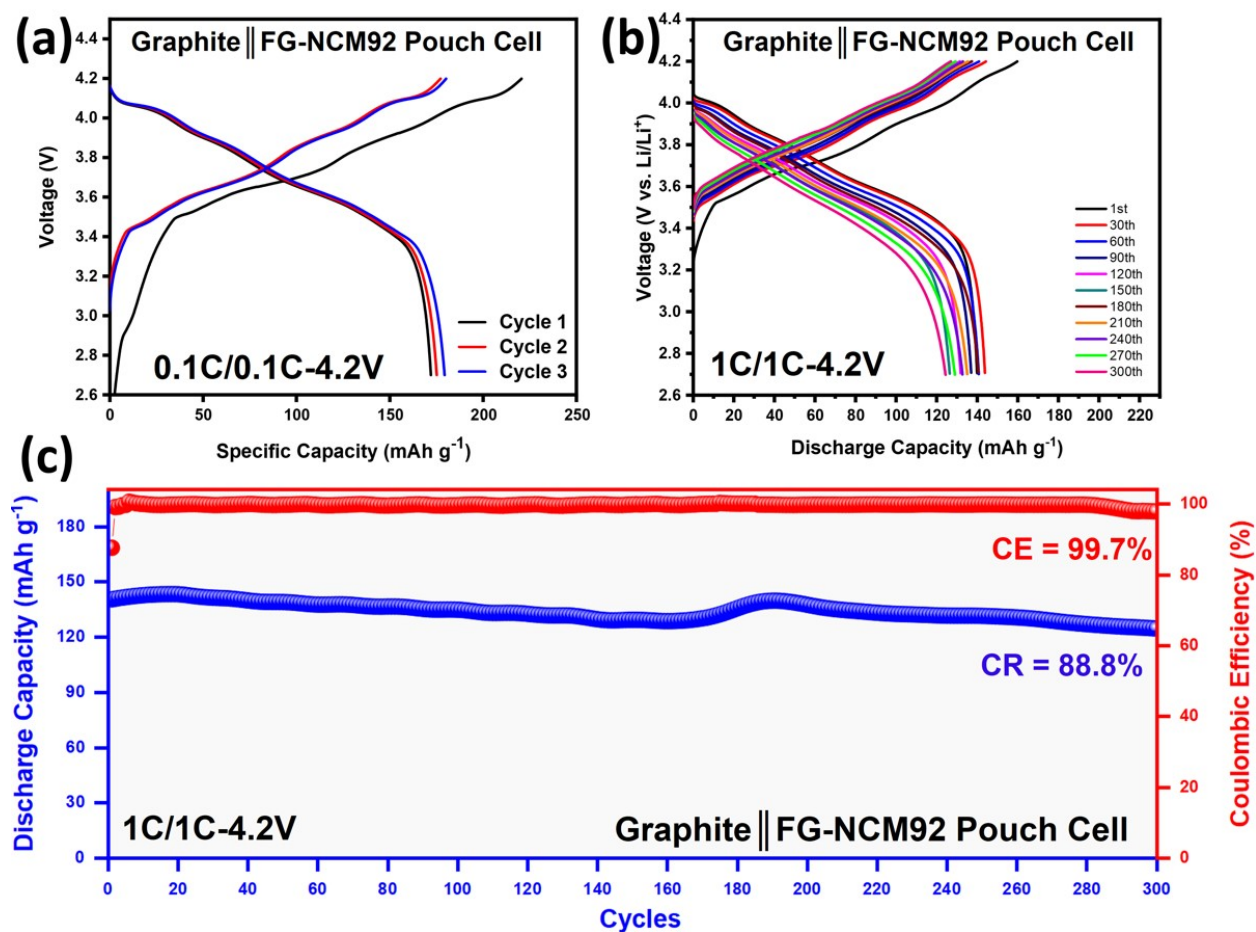

**Fig. S12.** The electrochemical performance of FG-NCM92//Graphite Pouch cells: (a). The charge and discharge profiles at 0.1C/0.1C, (b). The charge and discharge profiles at 1C/1C, (c). Long-term cycling performance of FG-NCM92//Graphite based on Pouch-type full-cells (Size: 3 × 5 cm<sup>2</sup>).

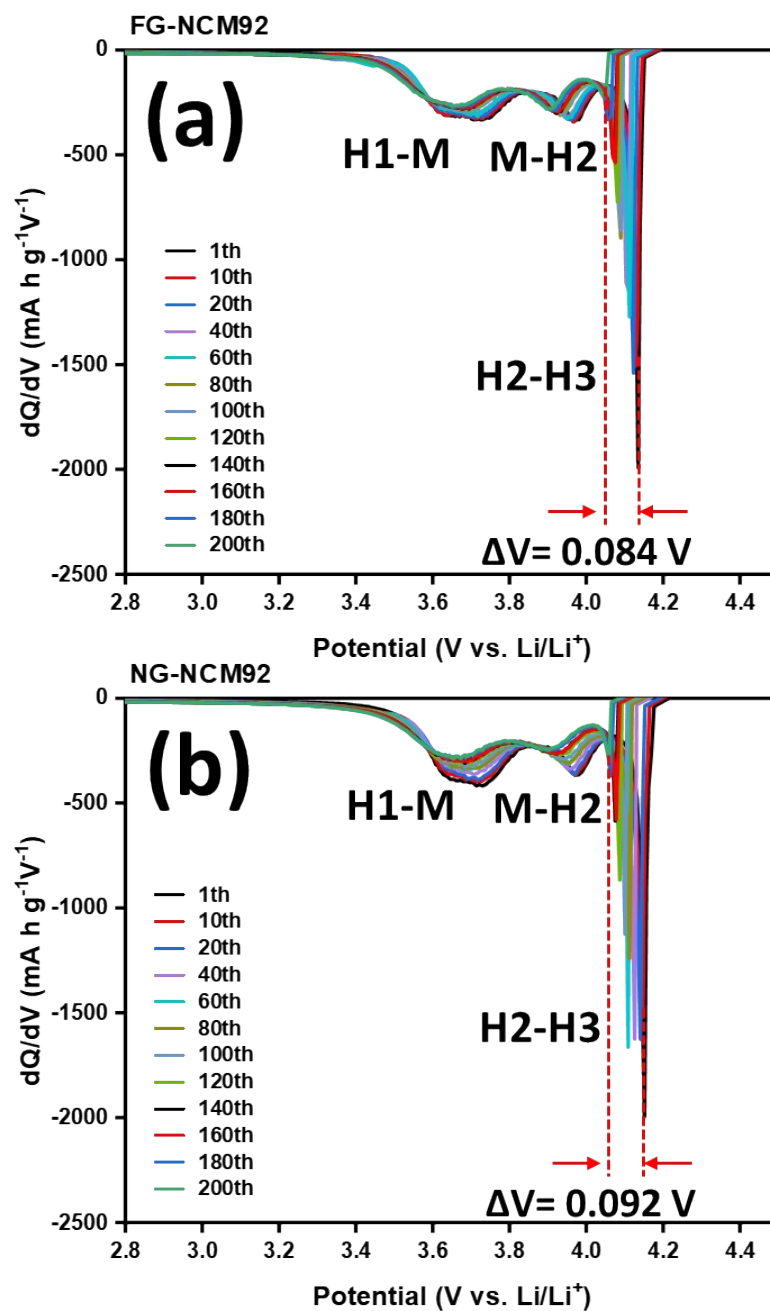

**Fig. S13.** Differential capacity ( $dQ/dV$ ) curves of (a) FG-NCM92, and (b) NG-NCM92 cathodes at 1C/1C in the voltage window of 2.8–4.3 V at RT for 200 cycles.



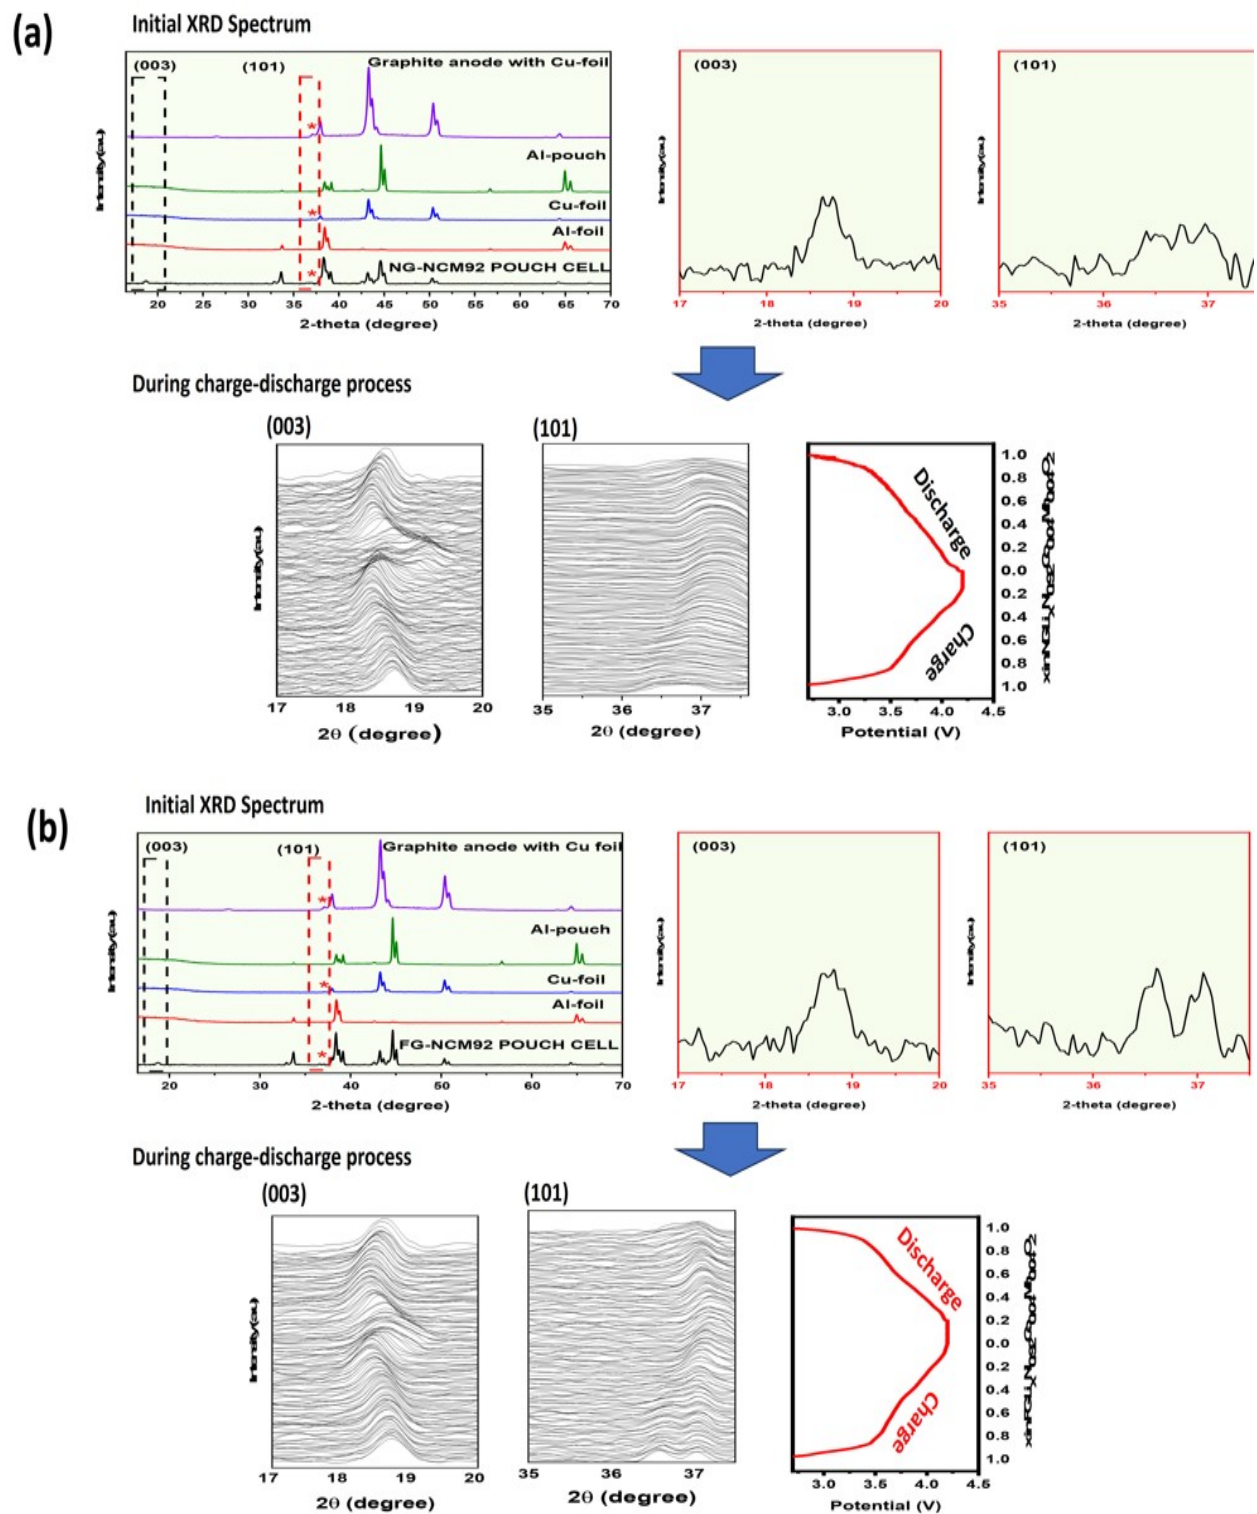

**Fig. S14.** Observed initial in-situ XRD pattern and XRD pattern at selected  $2\theta$  regions during initial cycles of charge/discharge process for (a) NG-NCM92, and (b) FG-NCM92 electrodes, respectively.



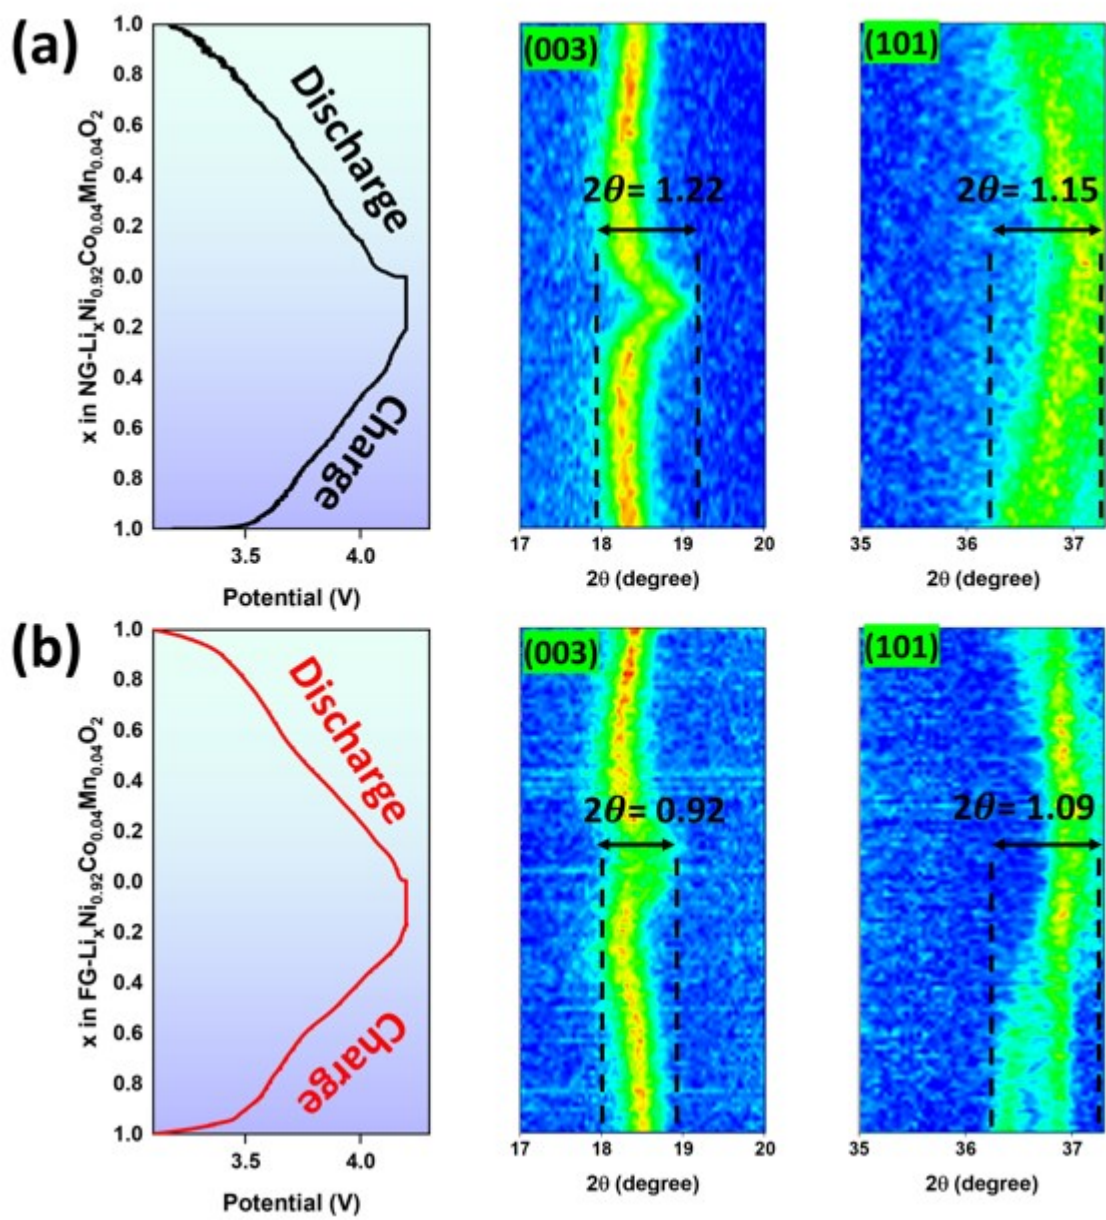

**Fig. S15.** In-situ XRD patterns at selected  $2\theta$  regions during second cycles for (a). NG-NCM92, (b). FG-NCM92 samples, respectively.

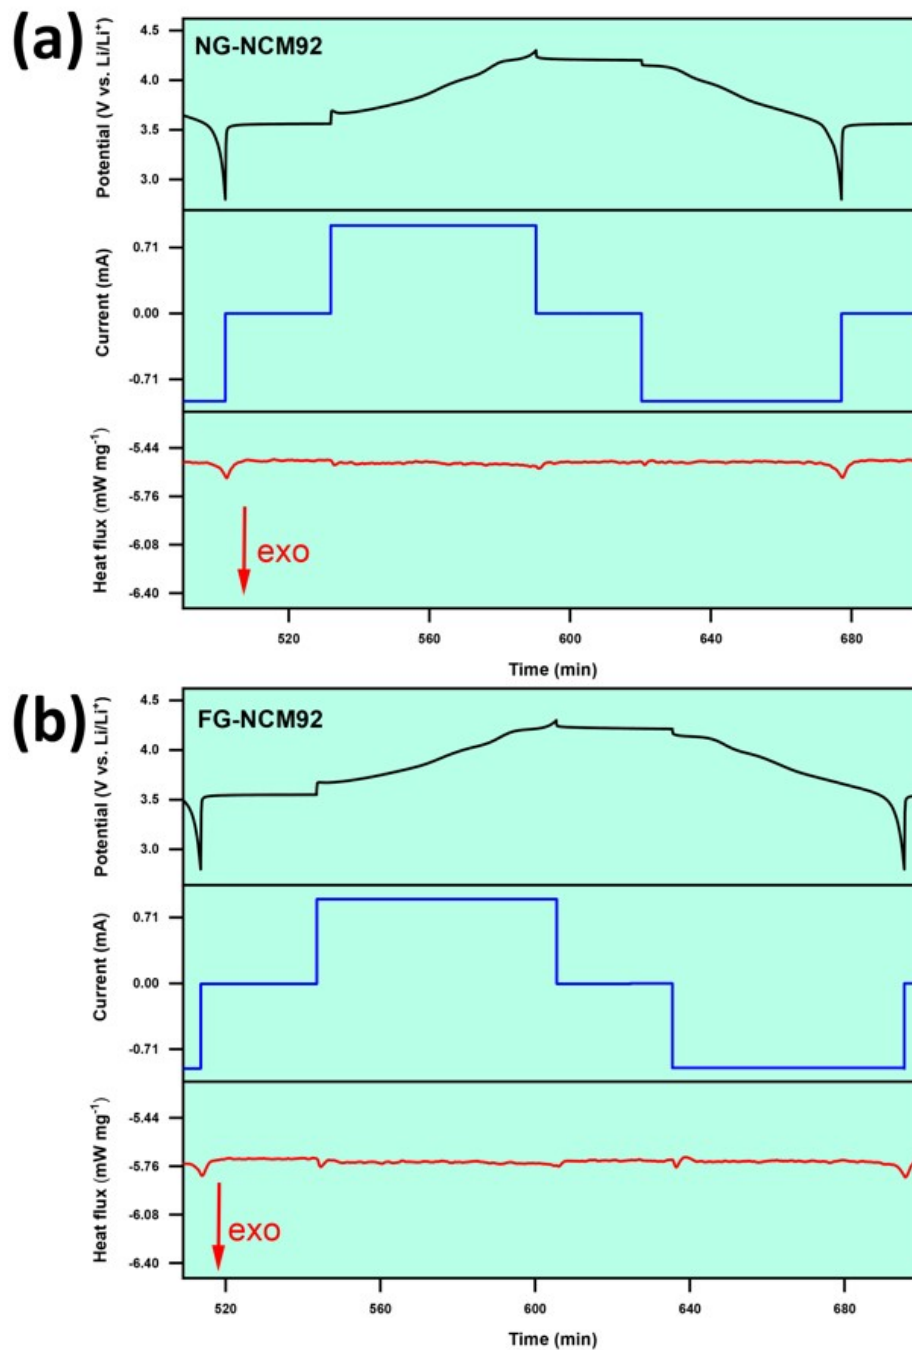

**Fig. S16.** Operando micro-calorimetry results for CR2032 coin cells containing: (a) NG-NCM92, and (b) FG-NCM92 electrodes at 1C/1C (in voltage window of 2.8–4.3 V (vs. Li/Li<sup>+</sup>)) in isothermal conditions at 35°C with heating rate of 0.5°C min<sup>-1</sup> (Potential (black line), current (blue line), and heat flux (red line)).

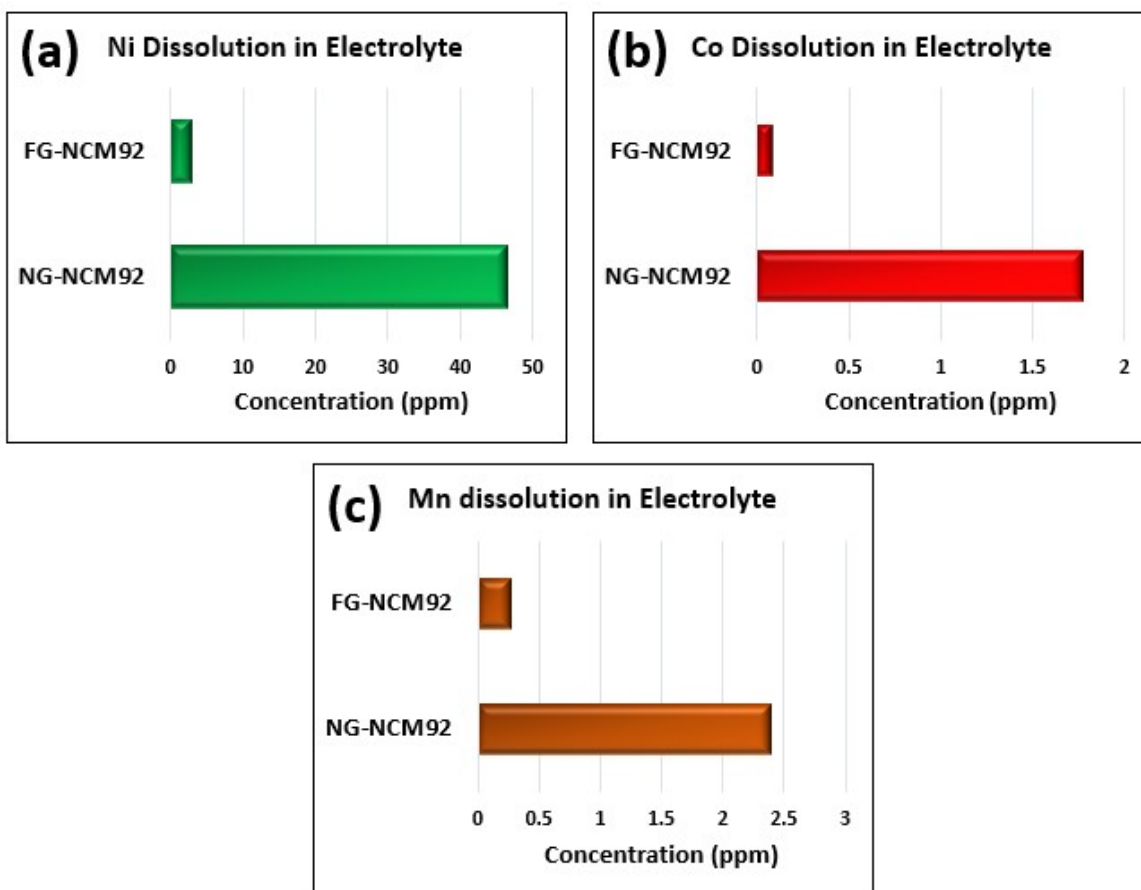

**Fig. S17.** The transition metal dissolution properties of NG-NCM92 and FG-NCM92 cathodes, which were measured by inductively coupled plasma mass spectrometry (ICP-MS): (a). Ni, (b). Co, (c). Mn.

**Table S1.** Rietveld refinement results of NG-NCM92 and FG-NCM92 layered oxide materials.

| Sample   | a (Å) | c (Å)  | V (Å <sup>3</sup> ) | c/a   | FWHM of (003) | R = I <sub>(003)</sub> /I <sub>(104)</sub> | Crystallite size (nm) | R <sub>wp</sub> <sup>d</sup> (%) | GoF <sup>e</sup> |
|----------|-------|--------|---------------------|-------|---------------|--------------------------------------------|-----------------------|----------------------------------|------------------|
| NG-NCM92 | 2.874 | 14.193 | 101.544             | 4.938 | 0.162         | 1.78                                       | 49.62                 | 3.66                             | 1.84             |
| FG-NCM92 | 2.873 | 14.195 | 101.451             | 4.942 | 0.156         | 1.82                                       | 51.46                 | 3.92                             | 2.07             |

**Table S2.** The in-situ XRD lattice parameters for NG-NCM92 and FG-NCM92 layered oxide materials during initial cycles.

|                                    | NG-NCM92           |                   |                     | FG-NCM92        |                   |                     |
|------------------------------------|--------------------|-------------------|---------------------|-----------------|-------------------|---------------------|
|                                    | Lithiated state    | Delithiated state | $\Delta_{\max}$ (%) | Lithiated state | Delithiated state | $\Delta_{\max}$ (%) |
|                                    | <i>c</i> -axis (Å) | 14.527            | 14.387              | 0.97            | 14.433            | 14.361              |
| <i>a</i> -axis (Å)                 | 2.850              | 2.833             | 0.61                | 2.846           | 2.831             | 0.35                |
| Unit-cell volume (Å <sup>3</sup> ) | 101.50             | 100.11            | 1.37                | 100.74          | 99.873            | 0.86                |

**Table S3.** Fitting results of EIS spectra of NG-NCM92 and FG-NCM92 electrodes before cycling and after 200 cycles.

| Sample               | Before Cycling |          | After 200 Cycles |          |
|----------------------|----------------|----------|------------------|----------|
|                      | NG-NCM92       | FG-NCM92 | NG-NCM92         | FG-NCM92 |
| R <sub>b</sub> (Ω)   | 3.76           | 1.55     | 4.63             | 3.05     |
| R <sub>CEI</sub> (Ω) | —              | —        | 6.17             | 6.10     |
| R <sub>int</sub> (Ω) | —              | —        | 20.50            | 18.00    |
| R <sub>ct</sub> (Ω)  | 138.50         | 118.50   | 610.00           | 581.80   |

**Table S4.** The Total Exothermic Heat Generation ( $Q_t$ ) and heat reduction of the NG-NCM92//Li coin-type cell and FG-NCM92//Li coin-type during charge/discharge processes at 35 °C.

| <b>Electrode</b> | <b>Total heat generation</b>                   |           | <b>Heat reduction</b>   |           |
|------------------|------------------------------------------------|-----------|-------------------------|-----------|
|                  | <b><math>Q_t</math><br/>(J g<sup>-1</sup>)</b> |           | <b>(%) vs. NG-NCM92</b> |           |
|                  | Charge                                         | Discharge | Charge                  | Discharge |
| NG-NCM92         | -18.94                                         | -26.59    | —                       | —         |
| FG-NCM92         | -17.57                                         | -23.04    | 7.2                     | 13.4      |

\*A negative  $Q_t$  value indicates an exothermic heat release
